# Supplementary material for: A Meta-analysis of Comorbidities in COVID-19: Which Diseases increase the Susceptibility of SARS-CoV-2 Infection?
Source: Preprints.org preprint supplement (doi:10.20944/preprints202009.0486.v1), 2020-09-21
Supplement: Supplementary file 1 [file supplementary]

## Supplementary Tables

**Table 1: List of Genes implicated in the entry and pathogenesis of Human coronaviruses**

| Genes | Reference (PMID/PMCID) | Evidence                                                                                                                                                                                                                                                                                                                                                                                    |
|-------|------------------------|---------------------------------------------------------------------------------------------------------------------------------------------------------------------------------------------------------------------------------------------------------------------------------------------------------------------------------------------------------------------------------------------|
| ACE2  | 32418199               | Angiotensin-converting enzyme 2 (ACE2) has been established as the functional host receptor for severe acute respiratory syndrome coronavirus 2 (SARS-CoV-2)                                                                                                                                                                                                                                |
| CCL2  | 15919935               | SARS-CoV induced the expression of chemokines such as CXCL10/IFN-gamma-inducible protein 10 and CCL2/monocyte chemoattractant protein 1                                                                                                                                                                                                                                                     |
| CD40  | 24845462               | A poor virus-specific CD4 and CD8 T cell response is attributed to an inefficient immune activation by SARS-CoV-MA15, particularly of respiratory DC (rDCs), as shown by reduced expression of MHC-II, CD86 and CD40 on cells harvested from the lung                                                                                                                                       |
| CLTC  | 17522231               | These results suggest that when SARS-CoV binds ACE2 it is internalized and penetrates early endosomes in a clathrin-dependent manner and that the cytoplasmic tail of ACE2 is not required for the penetration of SARS-CoV.                                                                                                                                                                 |
| CRP   | 32243911               | In the early stage of COVID-19 CRP levels were positively correlated with lung lesions and could reflect disease severity.                                                                                                                                                                                                                                                                  |
| CSF2  | 32513566               | In the short time since the emergence of COVID-19, numerous studies have described abnormal levels of the following cytokines and chemokines in the patients: IL-1, IL-2, IL-4, IL-6, IL-7, IL-10, IL-12, IL-13, IL-17, M-CSF, G-CSF, GM-CSF, IP-10, IFN- $\gamma$ , MCP-1, MIP 1- $\alpha$ , hepatocyte growth factor (HGF), TNF- $\alpha$ , and vascular endothelial growth factor (VEGF) |
| CSF3  | 32513566               | In the short time since the emergence of COVID-19, numerous studies have described abnormal levels of the following cytokines and chemokines in the patients: IL-1, IL-2, IL-4, IL-6, IL-7, IL-10, IL-12, IL-13, IL-17, M-CSF, G-CSF, GM-CSF, IP-10, IFN- $\gamma$ , MCP-1, MIP 1- $\alpha$ , hepatocyte growth factor (HGF), TNF- $\alpha$ , and vascular endothelial growth factor (VEGF) |
| CTSA  | 32221306               | Depending on virus strains and cell types, CoV S proteins may be cleaved by one or several host proteases, including furin, trypsin, cathepsins, transmembrane protease serine protease-2 (TMPRSS-2), TMPRSS-4, or human airway trypsin-like protease (HAT)                                                                                                                                 |
| CTSB  | 32221306               | Depending on virus strains and cell types, CoV S proteins may be cleaved by one or several host proteases, including furin, trypsin, cathepsins, transmembrane protease serine                                                                                                                                                                                                              |

|        |          |                                                                                                                                                                                                                                                             |
|--------|----------|-------------------------------------------------------------------------------------------------------------------------------------------------------------------------------------------------------------------------------------------------------------|
|        |          | protease-2 (TMPRSS-2), TMPRSS-4, or human airway trypsin-like protease (HAT)                                                                                                                                                                                |
| CTSD   | 32221306 | Depending on virus strains and cell types, CoV S proteins may be cleaved by one or several host proteases, including furin, trypsin, cathepsins, transmembrane protease serine protease-2 (TMPRSS-2), TMPRSS-4, or human airway trypsin-like protease (HAT) |
| CTSg   | 32221306 | Depending on virus strains and cell types, CoV S proteins may be cleaved by one or several host proteases, including furin, trypsin, cathepsins, transmembrane protease serine protease-2 (TMPRSS-2), TMPRSS-4, or human airway trypsin-like protease (HAT) |
| CTSk   | 32221306 | Depending on virus strains and cell types, CoV S proteins may be cleaved by one or several host proteases, including furin, trypsin, cathepsins, transmembrane protease serine protease-2 (TMPRSS-2), TMPRSS-4, or human airway trypsin-like protease (HAT) |
| CTSS   | 32221306 | Depending on virus strains and cell types, CoV S proteins may be cleaved by one or several host proteases, including furin, trypsin, cathepsins, transmembrane protease serine protease-2 (TMPRSS-2), TMPRSS-4, or human airway trypsin-like protease (HAT) |
| CXCL10 | 28466096 | SARS-CoV-infected airway epithelial cells (AECs) also produce large amounts of CCL3, CCL5, CCL2, and CXCL10                                                                                                                                                 |
| CXCL5  | 32446778 | SARS-CoV-2 upregulated only five of them, (namely, CXCL10, IL6, CCL2, CXCL1, CXCL5                                                                                                                                                                          |
| DPP4   | 32224164 | Antibodies directed against DPP4 inhibited human coronavirus-Erasmus Medical Center (hCoV-EMC) infection of primary human bronchial epithelial cells and Huh-7 cells.                                                                                       |
| FURIN  | 32362314 | The host cell protease furin cleaves the SARS-CoV-2 spike protein at the S1/S2 site                                                                                                                                                                         |
| IFNA10 | 26410416 | The nucleocapsid protein (N protein) of SARS-CoV plays an important role in inhibition of type I interferon (IFN) production via an unknown mechanism                                                                                                       |
| IFNA14 | 26410416 | The nucleocapsid protein (N protein) of SARS-CoV plays an important role in inhibition of type I interferon (IFN) production via an unknown mechanism                                                                                                       |
| IFNA16 | 26410416 | The nucleocapsid protein (N protein) of SARS-CoV plays an important role in inhibition of type I interferon (IFN) production via an unknown mechanism                                                                                                       |
| IFNA2  | 26410416 | The nucleocapsid protein (N protein) of SARS-CoV plays an important role in inhibition of type I interferon (IFN) production via an unknown mechanism                                                                                                       |
| IFNA21 | 26410416 | The nucleocapsid protein (N protein) of SARS-CoV plays                                                                                                                                                                                                      |

|        |          |                                                                                                                                                                                                                                                                                                                                                                                                                                                                                                                                                                   |
|--------|----------|-------------------------------------------------------------------------------------------------------------------------------------------------------------------------------------------------------------------------------------------------------------------------------------------------------------------------------------------------------------------------------------------------------------------------------------------------------------------------------------------------------------------------------------------------------------------|
|        |          | an important role in inhibition of type I interferon (IFN) production via an unknown mechanism                                                                                                                                                                                                                                                                                                                                                                                                                                                                    |
| IFNA8  | 26410416 | The nucleocapsid protein (N protein) of SARS-CoV plays an important role in inhibition of type I interferon (IFN) production via an unknown mechanism                                                                                                                                                                                                                                                                                                                                                                                                             |
| IFNAR1 | 32275914 | IFN-I are thus among the first cytokines produced during a viral infection. They are recognized by the IFNAR receptor present at the plasma membrane in most cell types.                                                                                                                                                                                                                                                                                                                                                                                          |
| IFNAR2 | 32275914 | IFN-I are thus among the first cytokines produced during a viral infection. They are recognized by the IFNAR receptor present at the plasma membrane in most cell types.                                                                                                                                                                                                                                                                                                                                                                                          |
| IFNB1  | 15476870 | Interferon-beta and Interferon-Gamma Synergistically Inhibit the Replication of Severe Acute Respiratory Syndrome-Associated Coronavirus (SARS-CoV)                                                                                                                                                                                                                                                                                                                                                                                                               |
| IFNG   | 15476870 | Interferon-beta and Interferon-Gamma Synergistically Inhibit the Replication of Severe Acute Respiratory Syndrome-Associated Coronavirus (SARS-CoV)                                                                                                                                                                                                                                                                                                                                                                                                               |
| IKBKB  | 32194980 | melatonin indirectly targets several HCoV cellular targets, including ACE2, BCL2L1, JUN, and IKBKB                                                                                                                                                                                                                                                                                                                                                                                                                                                                |
| IKBKE  | 32531085 | Along with interferon and innate immune signalling components, such as interferon regulatory factor 3 (IRF3), transmembrane protein 173 (TMEM173), TANK binding kinase 1 (TBK1), inhibitor of nuclear factor kappa B kinase subunit epsilon (IKBKE), tripartite motif containing 25 (TRIM25), mitochondrial antiviral signalling protein (MAVS) or DExD/H-box helicase 58 (DDX58), C1-INH is one of the proteins with the highest connectivity in the merged CoV-1 and CoV-2 interactomes                                                                         |
| IKBKG  | 28355270 | Compared to treatment with the prototypical inflammatory cytokine interleukin(IL)-1, HCoV-229E replication was found to attenuate the inducible activity of the transcription factor (TF) NF- $\kappa$ B and to restrict the nuclear concentration of NF- $\kappa$ B subunits by (i) an unusual mechanism involving partial degradation of IKK $\beta$ , NEMO and I $\kappa$ B $\alpha$ and (ii) upregulation of TNFAIP3 (A20), although constitutive IKK activity and basal TNFAIP3 expression levels were shown to be required for efficient virus replication. |
| IL10   | 32169119 | A few plasma cytokines and chemokines were observed ascended in COVID-19 patients, including IL-1, IL-2, IL-4, IL-7, IL-10, IL-12, IL-13, IL-17, GCSF, macrophage colony-stimulating factor (MCSF), IP-10, MCP-1, MIP-1 $\alpha$ , hepatocyte growth factor (HGF), IFN- $\gamma$ and TNF- $\alpha$                                                                                                                                                                                                                                                                |
| IL10RB | 24751921 | Type III IFNs signal through a different receptor, which is composed of IFNLR1 and IL10RB. Upon binding to their cognate receptors, type I and type III IFNs induce the same Jak/STAT pathway: the transphosphorylation and activation                                                                                                                                                                                                                                                                                                                            |

|      |          |                                                                                                                                                                                                                                                                                                                                                                                                                                       |
|------|----------|---------------------------------------------------------------------------------------------------------------------------------------------------------------------------------------------------------------------------------------------------------------------------------------------------------------------------------------------------------------------------------------------------------------------------------------|
|      |          | of receptor-associated Jak1 and Tyk2 leads to the phosphorylation of STAT1 and STAT2 transcription factors.                                                                                                                                                                                                                                                                                                                           |
| IL1B | 32291137 | Evidence suggests that CRS might play a major role in severe COVID-19. Inflammatory cytokines and chemokines, including interleukin-6 (IL-6), interleukin-1 $\beta$ (IL-1 $\beta$ ), induced protein 10 (IP10) and monocyte chemoattractant protein-1 (MCP-1) were significantly elevated in COVID-19 patients, and some were more commonly seen in severe patients than in nonsevere patients                                        |
| IL6  | 32291137 | Elevated IL-6 levels were observed in patients with SARS and were correlated with disease severity                                                                                                                                                                                                                                                                                                                                    |
| IL7  | 32169119 | A few plasma cytokines and chemokines were observed ascended in COVID-19 patients, including IL-1, IL-2, IL-4, IL-7, IL-10, IL-12, IL-13, IL-17, GCSF, macrophage colony-stimulating factor (MCSF), IP-10, MCP-1, MIP-1 $\alpha$ , hepatocyte growth factor (HGF), IFN- $\gamma$ and TNF- $\alpha$                                                                                                                                    |
| IL9  | 32561873 | Concentrations of IL-4, IL-9 and IL-13, which are associated with type 2 immunity, bronchial hypersensitivity and increased mucus production, are also high in patients with COVID-19                                                                                                                                                                                                                                                 |
| IRF3 | 25093995 | The cellular pathways mediated by interferon regulatory factor (IRF)-3 and -7, activating transcription factor (ATF)-2/jun, activator protein (AP)-1, nuclear factor kappa-light-chain-enhancer of activated B cells (NF- $\kappa$ B), and nuclear factor of activated T cells (NF-AT), are the main drivers of the inflammatory response triggered after viral infections, with NF- $\kappa$ B pathway the most frequently activated |
| IRF5 | 32733388 | Researchers hypothesized that after COVID-19 infects human cells, the virus utilizes an excess of glucose for a fast viral replication from the hexosamine biosynthetic pathway (HBP) hijacking substrates from the metabolic environment. This process induces overexpression of interferon IRF5, leading to a massive inflammatory gene overexpression, endoplasmic reticulum (ER) stress, and cytokine dysregulation profile.      |
| IRF7 | 25093995 | The cellular pathways mediated by interferon regulatory factor (IRF)-3 and -7, activating transcription factor (ATF)-2/jun, activator protein (AP)-1, nuclear factor kappa-light-chain-enhancer of activated B cells (NF- $\kappa$ B), and nuclear factor of activated T cells (NF-AT), are the main drivers of the inflammatory response triggered after viral infections, with NF- $\kappa$ B pathway the most frequently activated |
| IRF9 | 25093995 | Type I IFN signaling starts with its binding to IFNAR receptors at the cell surface, which leads to the activation of the JAK-STAT pathway . The members of the Janus Kinase                                                                                                                                                                                                                                                          |

|        |          |                                                                                                                                                                                                                                                                                                                                                                                                                                                                                                                                                                                                            |
|--------|----------|------------------------------------------------------------------------------------------------------------------------------------------------------------------------------------------------------------------------------------------------------------------------------------------------------------------------------------------------------------------------------------------------------------------------------------------------------------------------------------------------------------------------------------------------------------------------------------------------------------|
|        |          | (JAK) family JAK-1 and protein tyrosine kinase 2 (TYK-2) phosphorylate the signal transducer and activators of transcription (STATs) which become activated. Phosphorylated STAT1 and STAT2 recruit IRF-9, to form the IFN stimulated gene factor 3 (ISGF3) complex. The ISGF3 heterotrimer translocates to the nucleus and triggers the transcription of IFN-stimulated genes (ISGs) that will drive the antiviral response.                                                                                                                                                                              |
| JAK1   | 25093995 | Type I IFN signaling starts with its binding to IFNAR receptors at the cell surface, which leads to the activation of the JAK-STAT pathway . The members of the Janus Kinase (JAK) family JAK-1 and protein tyrosine kinase 2 (TYK-2) phosphorylate the signal transducer and activators of transcription (STATs) which become activated. Phosphorylated STAT1 and STAT2 recruit IRF-9, to form the IFN stimulated gene factor 3 (ISGF3) complex. The ISGF3 heterotrimer translocates to the nucleus and triggers the transcription of IFN-stimulated genes (ISGs) that will drive the antiviral response. |
| MAP3K7 | 28933406 | Phosphorylation of all three MAPK members has been detected in cells infected with SARS-CoV                                                                                                                                                                                                                                                                                                                                                                                                                                                                                                                |
| MAPK1  | 22936401 | Results point to SARS-CoV PL pro triggering TGF- $\beta$ 1 production via ubiquitin proteasome, p38 MAPK , and ERK 1/2-mediated signaling.                                                                                                                                                                                                                                                                                                                                                                                                                                                                 |
| MAPK14 | 22936401 | Results point to SARS-CoV PL pro triggering TGF- $\beta$ 1 production via ubiquitin proteasome, p38 MAPK , and ERK 1/2-mediated signaling.                                                                                                                                                                                                                                                                                                                                                                                                                                                                 |
| MAPK3  | 28933406 | Expression of SARS-CoV PLpro was shown to increase ERK1 ubiquitin-mediated degradation to suppress IFN-induced responses                                                                                                                                                                                                                                                                                                                                                                                                                                                                                   |
| MYD88  | 19079579 | MyD88 Is Required for Protection from Lethal Infection with a Mouse-Adapted SARS-CoV                                                                                                                                                                                                                                                                                                                                                                                                                                                                                                                       |
| NFKB1  | 24198408 | Inhibition of NF- $\kappa$ B-mediated Inflammation in Severe Acute Respiratory Syndrome Coronavirus-Infected Mice Increases Survival                                                                                                                                                                                                                                                                                                                                                                                                                                                                       |
| NFKB2  | 24198408 | Inhibition of NF- $\kappa$ B-mediated Inflammation in Severe Acute Respiratory Syndrome Coronavirus-Infected Mice Increases Survival                                                                                                                                                                                                                                                                                                                                                                                                                                                                       |
| NLRP3  | 32574259 | Due to this crucial role in triggering inflammatory response to infection, the NLRP3 inflammasome appears to be a potential drug target in the treatment of coronavirus disease 2019 (COVID-19), caused by SARS-CoV-2                                                                                                                                                                                                                                                                                                                                                                                      |
| PCSK1  | 32099652 | Diabetes is associated with an increase in furin, which is a type-1 membrane-bound protease, belonging to the proprotein convertase subtilisin/kexin family (PCSK). It is involved in the entry of coronaviruses into the cell and                                                                                                                                                                                                                                                                                                                                                                         |

|         |            |                                                                                                                                                                                                                                                                                                                            |
|---------|------------|----------------------------------------------------------------------------------------------------------------------------------------------------------------------------------------------------------------------------------------------------------------------------------------------------------------------------|
|         |            | increased Furin has been reported in diabetes, which might facilitate viral replication                                                                                                                                                                                                                                    |
| PCSK2   | 32099652   | Diabetes is associated with an increase in furin, which is a type-1 membrane-bound protease, belonging to the proprotein convertase subtilisin/kexin family (PCSK). It is involved in the entry of coronaviruses into the cell and increased Furin has been reported in diabetes, which might facilitate viral replication |
| PCSK5   | PMC7122180 | the furin-like PCs PACE4, PC5, and PC7 may selectively compensate the activation of viral glycoproteins in furin-deficient cells and tissues with different efficiencies.                                                                                                                                                  |
| PCSK6   | 32838164   | furin is likely to be a functional complementarity or redundancy of PCSK6                                                                                                                                                                                                                                                  |
| PCSK7   | PMC7122180 | the furin-like PCs PACE4, PC5, and PC7 may selectively compensate the activation of viral glycoproteins in furin-deficient cells and tissues with different efficiencies.                                                                                                                                                  |
| PIAS1   | PMC7129356 | The nucleocapsid protein of SARS CoV interacts with PIAS1 and affects the NFkappaB pathway                                                                                                                                                                                                                                 |
| PIAS3   | 9724754    | Inhibition of Stat1-mediated Gene Activation by PIAS1                                                                                                                                                                                                                                                                      |
| RARG    | 32459003   | RA is the biologically active retinoid metabolite that, acting through its cognate receptors RA receptors (RAR $\alpha$ , $\beta$ and $\gamma$ ), regulates the expression of genes involved numerous biological pathways including both adaptive and innate immune responses                                              |
| RARRES3 | 30988429   | Thus, while we cannot exclude additional antiviral actions, RARRES3 likely exerts an antiviral effect by downregulating mTOR                                                                                                                                                                                               |
| REL     | 28933406   | Mammalian NF- $\kappa$ B family composes of five members, RelA (also named p65), RelB, c-Rel, NF- $\kappa$ B1 p50, and NF- $\kappa$ B2 p52, which form dimers in the cytoplasm, A recent study reported an enhanced nuclear NF- $\kappa$ B activity in PBMCs treated with a purified and recombinant SARS-CoV S protein    |
| RELA    | 28933406   | Mammalian NF- $\kappa$ B family composes of five members, RelA (also named p65), RelB, c-Rel, NF- $\kappa$ B1 p50, and NF- $\kappa$ B2 p52, which form dimers in the cytoplasm, A recent study reported an enhanced nuclear NF- $\kappa$ B activity in PBMCs treated with a purified and recombinant SARS-CoV S protein    |
| RELB    | 28933406   | Mammalian NF- $\kappa$ B family composes of five members, RelA (also named p65), RelB, c-Rel, NF- $\kappa$ B1 p50, and NF- $\kappa$ B2 p52, which form dimers in the cytoplasm, A recent study reported an enhanced nuclear NF- $\kappa$ B activity in PBMCs treated with a purified and recombinant SARS-CoV S protein    |
| SOCS1   | 30185587   | The induction of SOCS1 and SOCS3 to counteract IFN                                                                                                                                                                                                                                                                         |

|           |          |                                                                                                                                                                                                                                                                                                                                                                                                                                                                                                                                                                                                                                    |
|-----------|----------|------------------------------------------------------------------------------------------------------------------------------------------------------------------------------------------------------------------------------------------------------------------------------------------------------------------------------------------------------------------------------------------------------------------------------------------------------------------------------------------------------------------------------------------------------------------------------------------------------------------------------------|
|           |          | antiviral responses is also observed in other viruses, such as SARS-CoV                                                                                                                                                                                                                                                                                                                                                                                                                                                                                                                                                            |
| SOCS3     | 16482545 | Induction level of suppressor of cytokine signaling-3 (SOCS3) by SARS-CoV was significantly lower than that by RSV in spite of the significant production of IL-6                                                                                                                                                                                                                                                                                                                                                                                                                                                                  |
| STAT1     | 25093995 | Type I IFN signaling starts with its binding to IFNAR receptors at the cell surface, which leads to the activation of the JAK–STAT pathway (Samuel, 2001) (Fig. 2 ). The members of the Janus Kinase (JAK) family JAK-1 and protein tyrosine kinase 2 (TYK-2) phosphorylate the signal transducer and activators of transcription (STATs) which become activated. Phosphorylated STAT1 and STAT2 recruit IRF-9, to form the IFN stimulated gene factor 3 (ISGF3) complex. The ISGF3 heterotrimer translocates to the nucleus and triggers the transcription of IFN-stimulated genes (ISGs) that will drive the antiviral response. |
| STAT2     | 25093995 | Type I IFN signaling starts with its binding to IFNAR receptors at the cell surface, which leads to the activation of the JAK–STAT pathway (Samuel, 2001) (Fig. 2 ). The members of the Janus Kinase (JAK) family JAK-1 and protein tyrosine kinase 2 (TYK-2) phosphorylate the signal transducer and activators of transcription (STATs) which become activated. Phosphorylated STAT1 and STAT2 recruit IRF-9, to form the IFN stimulated gene factor 3 (ISGF3) complex. The ISGF3 heterotrimer translocates to the nucleus and triggers the transcription of IFN-stimulated genes (ISGs) that will drive the antiviral response. |
| STAT3     | 26199948 | Severe acute respiratory syndrome coronavirus (SARS-CoV) infection results in STAT3 dephosphorylation.                                                                                                                                                                                                                                                                                                                                                                                                                                                                                                                             |
| TBK1      | 25093995 | ARS-CoV membrane (M) protein impairs the formation of TRAF3/TANK/TBK1/IKK $\epsilon$ complex, inhibiting IFN- $\beta$ production                                                                                                                                                                                                                                                                                                                                                                                                                                                                                                   |
| TLR3      | 26015500 | Toll-Like Receptor 3 Signaling via TRIF Contributes to a Protective Innate Immune Response to Severe Acute Respiratory Syndrome Coronavirus Infection                                                                                                                                                                                                                                                                                                                                                                                                                                                                              |
| TLR4      | 30571771 | Mice lacking TLR4 had either similar survival rates or even more severe disease than wild-type mice infected with DENV, EBOV, SARS-CoV, or RSV                                                                                                                                                                                                                                                                                                                                                                                                                                                                                     |
| TLR7      | 32342146 | The prominent ligand for TLR7 and 8 is viral ssRNA                                                                                                                                                                                                                                                                                                                                                                                                                                                                                                                                                                                 |
| TLR8      | 32342146 | The prominent ligand for TLR7 and 8 is viral ssRNA                                                                                                                                                                                                                                                                                                                                                                                                                                                                                                                                                                                 |
| TMPRSS11D | 32221306 | Expression of TMPRSS 2, 4, 11 A, 11D, and 11E on 293/hACE2 cells enhanced SARS-CoV-2 S protein-mediated cell–cell fusion similarly to SASR-CoV S                                                                                                                                                                                                                                                                                                                                                                                                                                                                                   |
| TMPRSS11E | 32221306 | Expression of TMPRSS 2, 4, 11 A, 11D, and 11E on 293/hACE2 cells enhanced SARS-CoV-2 S protein-mediated cell–cell fusion similarly to SASR-CoV S                                                                                                                                                                                                                                                                                                                                                                                                                                                                                   |

|         |          |                                                                                                                                                                                                                                                                                                                                                                                                                                                                                                                                                                                                                                    |
|---------|----------|------------------------------------------------------------------------------------------------------------------------------------------------------------------------------------------------------------------------------------------------------------------------------------------------------------------------------------------------------------------------------------------------------------------------------------------------------------------------------------------------------------------------------------------------------------------------------------------------------------------------------------|
| TMPRSS2 | 32221306 | Expression of TMPRSS 2, 4, 11 A, 11D, and 11E on 293/hACE2 cells enhanced SARS-CoV-2 S protein-mediated cell–cell fusion similarly to SARS-CoV S                                                                                                                                                                                                                                                                                                                                                                                                                                                                                   |
| TMPRSS4 | 32221306 | Expression of TMPRSS 2, 4, 11 A, 11D, and 11E on 293/hACE2 cells enhanced SARS-CoV-2 S protein-mediated cell–cell fusion similarly to SARS-CoV S                                                                                                                                                                                                                                                                                                                                                                                                                                                                                   |
| TRAF3   | 19380580 | Severe Acute Respiratory Syndrome Coronavirus M Protein Inhibits Type I Interferon Production by Impeding the Formation of TRAF3·TANK·TBK1/IKK $\epsilon$ Complex*                                                                                                                                                                                                                                                                                                                                                                                                                                                                 |
| TRAF6   | 27164085 | SARS Coronavirus Papain-Like Protease Inhibits the TLR7 Signaling Pathway Through Removing Lys63-Linked Polyubiquitination of TRAF3 and TRAF6                                                                                                                                                                                                                                                                                                                                                                                                                                                                                      |
| TYK2    | 25093995 | Type I IFN signaling starts with its binding to IFNAR receptors at the cell surface, which leads to the activation of the JAK–STAT pathway (Samuel, 2001) (Fig. 2 ). The members of the Janus Kinase (JAK) family JAK-1 and protein tyrosine kinase 2 (TYK-2) phosphorylate the signal transducer and activators of transcription (STATs) which become activated. Phosphorylated STAT1 and STAT2 recruit IRF-9, to form the IFN stimulated gene factor 3 (ISGF3) complex. The ISGF3 heterotrimer translocates to the nucleus and triggers the transcription of IFN-stimulated genes (ISGs) that will drive the antiviral response. |



## Supplementary Figures

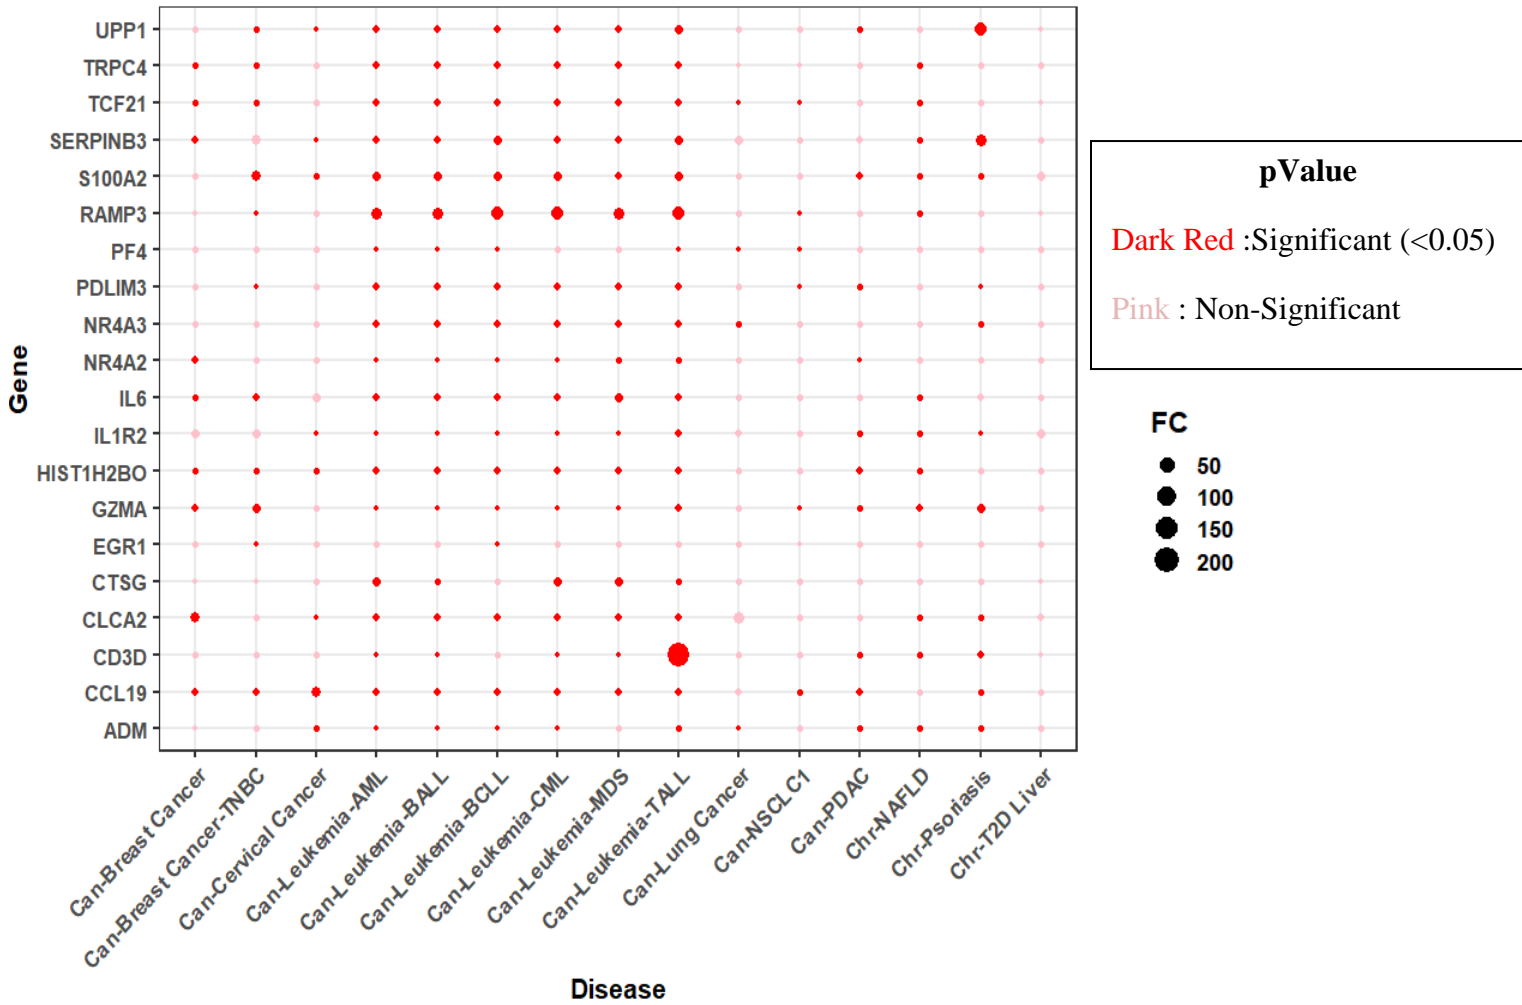

**Figure 1: Bubble plot of expression pattern, in select disease types, of top 20 genes that are differentially expressed in SARS-CoV-2 patients.**
